# Supplementary material for: Photothermal properties of MXenes and sterilization of MRSA by Nb2C/Gel with a low power NIR-II laser
Source: Royal Society of Chemistry journal article supplement (doi:10.1039/d4nj00245h), 2024-01-01
Supplement: d4nj00245h1.pdf [file d4nj00245h1.pdf]

## Supporting Information

### **Photothermal Properties of MXenes and Sterilization of MRSA by Nb<sub>2</sub>C/Gel with Low Power NIR-II laser**

Yekai Zheng,<sup>a</sup> Xinyi Fu,<sup>b</sup> Li Jiang,<sup>\*a</sup> Denghao Li,<sup>a</sup> Weidan Zhao,<sup>a</sup> Mi Liu,<sup>a</sup> Jiali Liu,<sup>a</sup> Shangzhong Jin<sup>a</sup> and Yan Zhou<sup>\*b</sup>

<sup>a</sup>. *Collegel of Optical and Electronic Technology, China Jiliang University, Hangzhou 310018, P. R. China. Email: lijiaang@cjl.u.edu.cn*

<sup>b</sup>. *Wenzhou Key Laboratory of Sanitary Microbiology, Key Laboratory of Laboratory Medicine, Ministry of Education, China, School of Laboratory Medicine and Life Sciences, Wenzhou Medical University, Wenzhou, Zhejiang, 325035, P. R. China. Email: zhouyan@wmu.edu.cn*

After the laser is irradiated, the solution temperature begins to drop. The data from the solution cooling from the highest temperature to room temperature were collected and the photothermal conversion efficiency (PCE,  $\eta$ ) was calculated.

The calculation equation was as follows:

$$\eta = \frac{hS(T_{Max} - T_{Surr}) - Q_{Dis}}{I(1 - 10^{-A})}$$

$$hS = \frac{c_D m_D}{\tau_s}$$

$$\tau_s = -\frac{dt}{d \ln \theta}$$

$$\theta = \frac{T - T_{Surr}}{T_{Max} - T_{Surr}}$$

$$Q_{Dis} = \frac{c_D m_D (T_{Max(water)} - T_{Surr})}{\tau_{s(water)}}$$

where  $T_{Max}$  is the photothermal saturation temperature of the sample (°C),  $T_{Surr}$  was the ambient temperature (°C),  $I$  was laser power (W),  $A$  is the absorbance of the sample at a specific laser wavelength.  $S$  was container surface area, and  $h$  was heat-transfer coefficient. Addition,  $m_D$  and  $c_D$  are the specific heat capacity of the mass of the solvent (water), respectively. And  $\tau_s$  is the sample heat transfer time constant. At last,  $Q_{Dis}$  is the heat dissipated by the solvent and sample cell.

The infrared thermal images of different materials during different periods of laser irradiation are shown below.

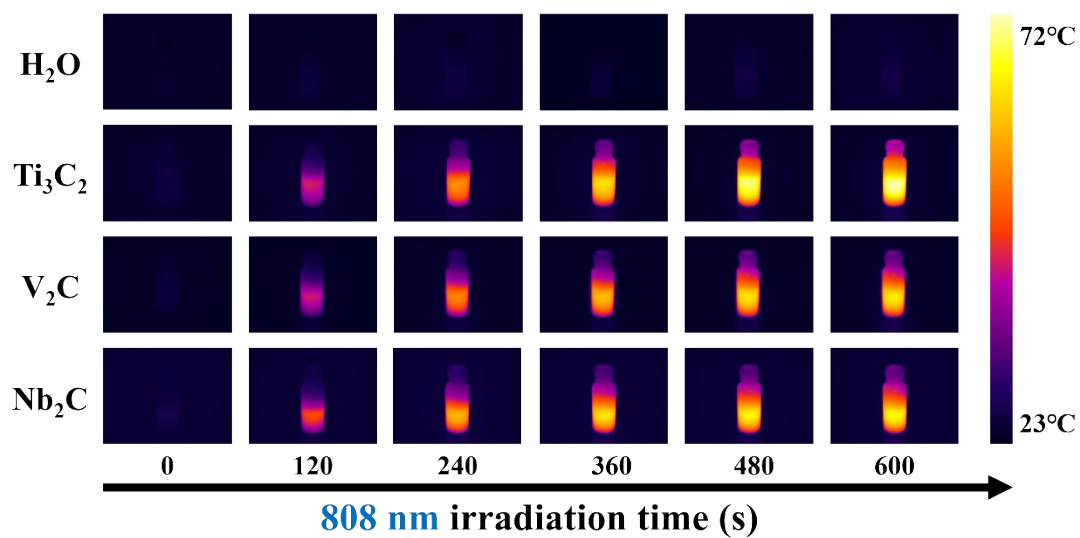

**Fig. S1** Infrared image of Ti<sub>3</sub>C<sub>2</sub>, Nb<sub>2</sub>C and V<sub>2</sub>C under 808 nm laser (1.5 W) irradiation. It was recorded every 120 s. H<sub>2</sub>O was the control.

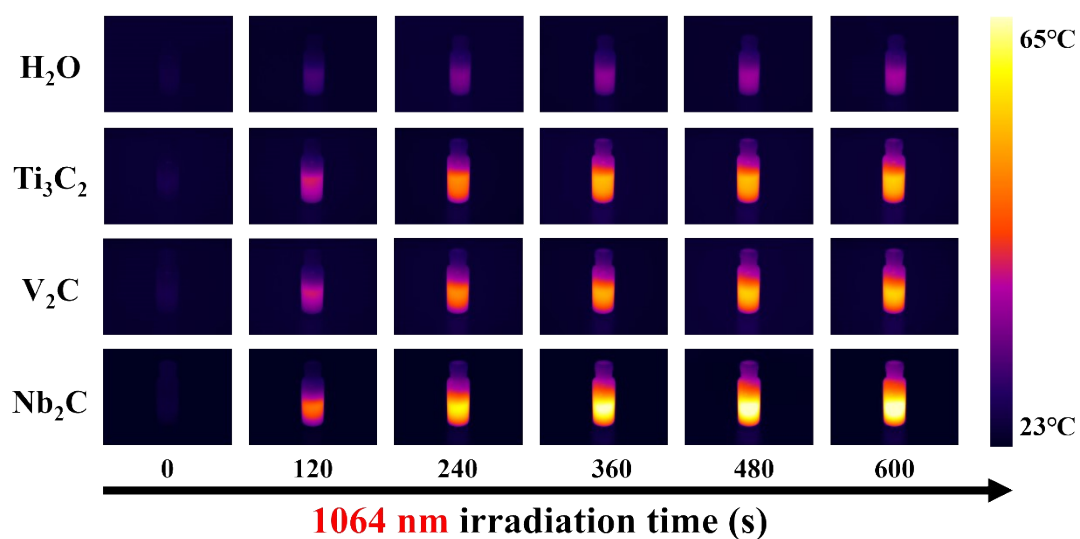

**Fig. S2** Infrared image of Ti<sub>3</sub>C<sub>2</sub>, Nb<sub>2</sub>C and V<sub>2</sub>C under 1064 nm laser (1.5 W) irradiation. It was recorded every 120 s. H<sub>2</sub>O was the control.

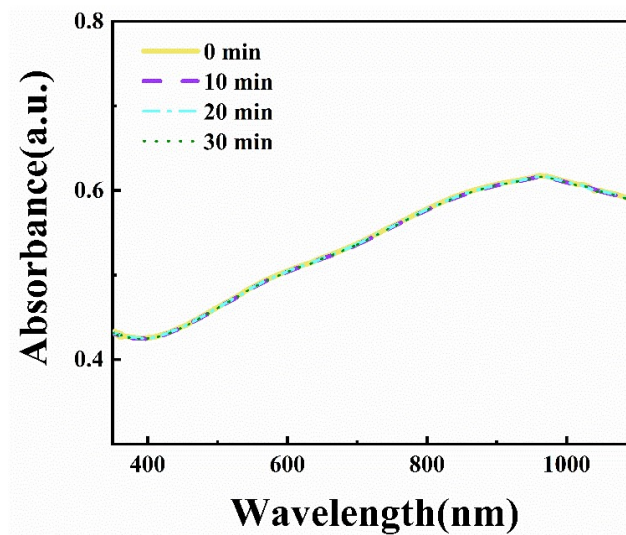

**Fig. S3** Absorption spectrum of Nb<sub>2</sub>C under 30 minutes laser irradiation.

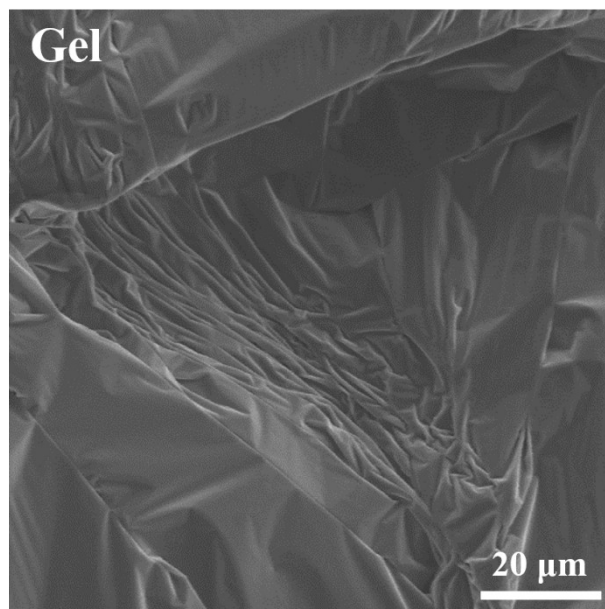

**Fig. S4** SEM image of PLGA-PEG-PLGA gel with wrinkled surface.

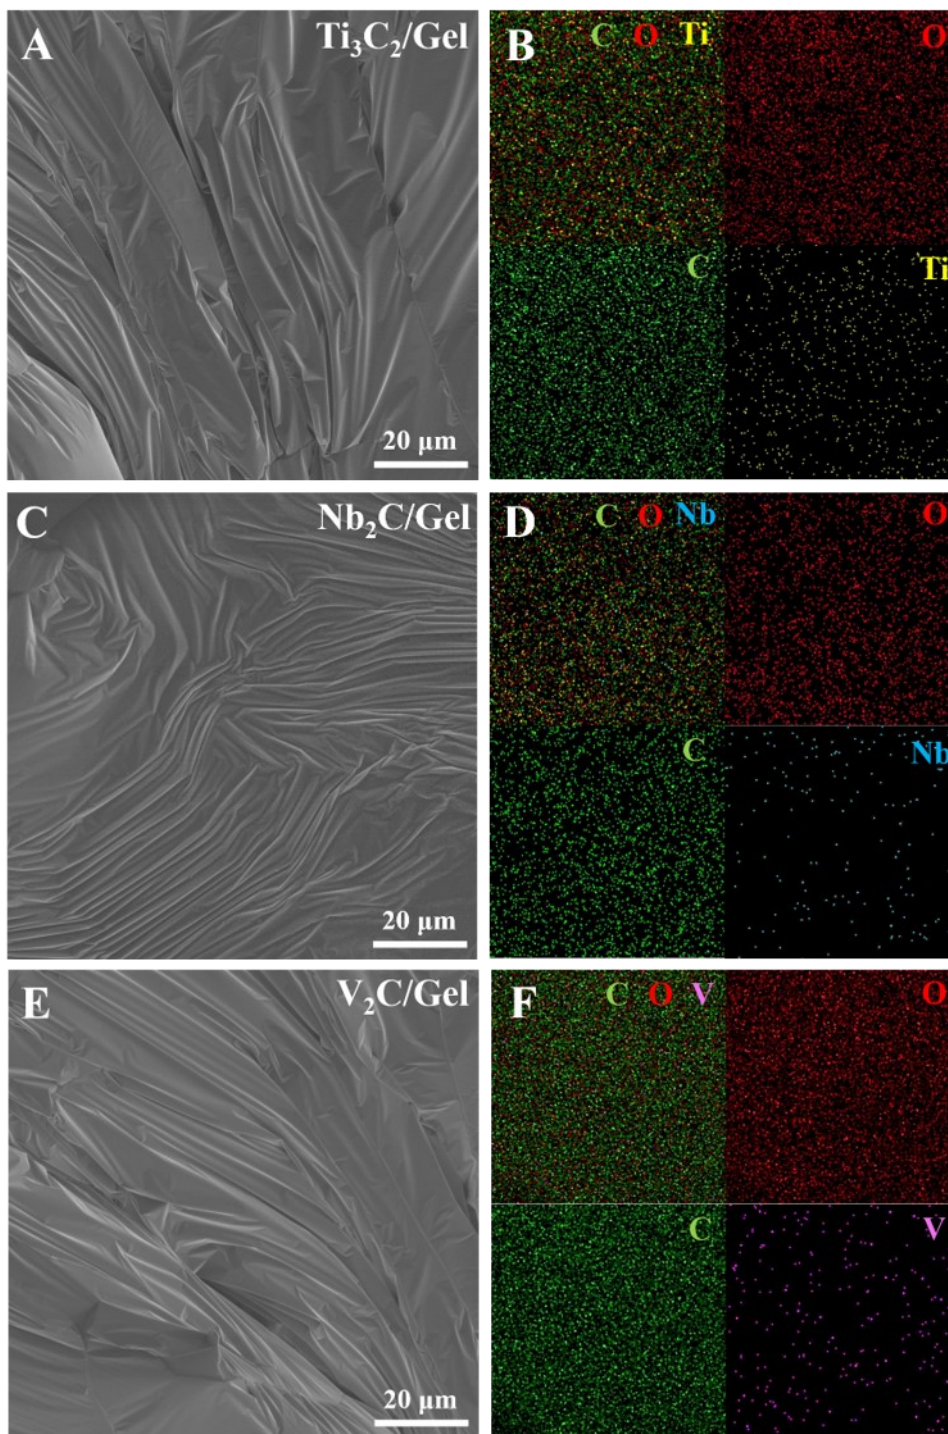

**Fig. S5** SEM (A, C and E) and EDS (B, D and F) images of Ti<sub>3</sub>C<sub>2</sub>/Gel, Nb<sub>2</sub>C/Gel and V<sub>2</sub>C/Gel.

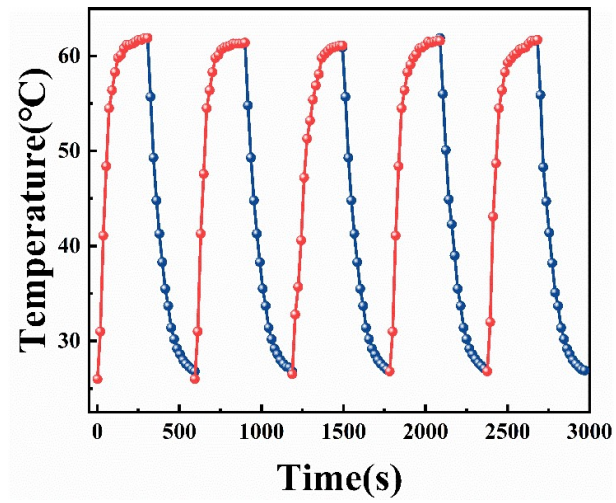

**Fig. S6** The photothermal cycle of Nb<sub>2</sub>C/Gel in 5 laser on/off cycles.

**Table S1** PCE of materials

| Materials                      | Laser   | Photothermal efficiency | Ref.      |
|--------------------------------|---------|-------------------------|-----------|
| TaN                            | 808 nm  | 24.8%                   | [1]       |
| Ta <sub>4</sub> C <sub>3</sub> | 808 nm  | 44.7%                   | [2]       |
| V <sub>2</sub> N               | 1064 nm | 31.67%                  | [3]       |
| Mo <sub>2</sub> C              | 1064 nm | 43.3%                   | [4]       |
| Pd Nanosheet/Janus             | 1064 nm | 20%                     | [5]       |
| WNNS@hydrogel                  | 1064 nm | 29.5%                   | [6]       |
| Ti <sub>2</sub> N QDs          | 1064 nm | 45.51%                  | [7]       |
| Nb <sub>2</sub> C              | 1064 nm | 45.55%                  | This work |

**Table S2** Antibacterial activity of materials

| Materials                              | Laser   | Power                  | Time                           | Bacterial Survival Rate                                                                          | Ref.      |
|----------------------------------------|---------|------------------------|--------------------------------|--------------------------------------------------------------------------------------------------|-----------|
| PVA/SA-DA20/BTPP <sup>+</sup> hydrogel | /       | /                      | 12 h                           | E. coli is 23%<br>S. aureus is 18%                                                               | [8]       |
| MCA-NI-AA/NP/ZIF8 hydrogel             | 808 nm  | 2.5 W/cm <sup>2</sup>  | 10 min<br>10 min +mixed<br>1 h | E. coli is about 45%<br>S. aureus is about 45%<br>E. coli is about 10%<br>S. aureus is about 10% | [9]       |
| AuNst <sub>120</sub>                   | /       | /                      | 8 h                            | S. aureus is 40%                                                                                 | [10]      |
| PAI hydrogel                           | 808 nm  | 1.33 W/cm <sup>2</sup> | 5 min +mixed<br>1 h            | E. coli is 8%<br>MRSA is 3.8%                                                                    | [11]      |
| MnCN                                   | 1064 nm | 1 W/cm <sup>2</sup>    | 10 min                         | E. coli is 15.3%<br>S. aureus is 8.3%                                                            | [12]      |
| Gel (AIPH/POM)                         | 1060 nm | 1 W/cm <sup>2</sup>    | 10 min                         | S. aureus is > 20%                                                                               | [13]      |
| TMH@Gel                                | 1064 nm | 0.64 W/cm <sup>2</sup> | 10 min +dark<br>10 min         | S. aureus is about 3%<br>E. coli is about 15%                                                    | [14]      |
| Nb <sub>2</sub> C/Gel                  | 1064 nm | 0.99 W/cm <sup>2</sup> | 5 min                          | MRSA is 7.52%                                                                                    | This work |

## References

- 1 P. Lin, P. Luo, Y. Guo, H. Qiu, M. Wang and G. Huang, *Part. Part. Syst. Charact.*, 2021, **38**, 2100113.
- 2 H. Lin, Y. Wang, S. Gao, Y. Chen and J. Shi, *Adv. Mater.*, 2017, **30**, 1703284.
- 3 X. Sun, X. He, Y. Zhu, E. Obeng, B. Zeng, H. Deng, J. Shen and R. Hu, *Chem. Eng. J.*, 2023, **451**, 138985.
- 4 W. Feng, R. Wang, Y. Zhou, L. Ding, X. Gao, B. Zhou, P. Hu and Y. Chen, *Adv. Funct. Mater.*, 2019, **29**, 1901942.
- 5 L. Zhang, S. Li, X. Chen, T. Wang, L. Li, Z. Su and C. Wang, *Adv. Funct. Mater.*, 2018, **28**, 1803815.
- 6 Q. Xu, S. Zhao, L. Deng, J. Ouyang, M. Wen, K. Zeng, W. Chen, L. Zhang and Y.-N. Liu, *Chem. Commun.*, 2019, **55**, 9471-9474.
- 7 J. Shao, J. Zhang, C. Jiang, J. Lin and P. Huang, *Chem. Eng. J.*, 2020, **400**, 126009.
- 8 Q. Lei, Y. Zhang, W. Zhang, R. Li, N. Ao and H. Zhang, *Carbohydr. Polym.*, 2021, **272**, 118513.
- 9 L. Feng, Q. Chen, H. Cheng, Q. Yu, W. Zhao and C. Zhao, *Adv. Healthcare Mater.*, 2022, **11**, 2201049.
- 10 S. Kaul, P. Sagar, R. Gupta, P. Garg, N. Priyadarshi and N. K. Singhal, *ACS Appl. Mater. Interfaces*, 2022, **14**, 44084-44097.
- 11 Z. Miao, Y. Sun, Z. Tao, Y. Chen, Y. Ma, D. Zhu, X. Huang and Z. Zha, *Adv. Healthcare Mater.*, 2021, **10**, 2100722.
- 12 X. Ren, X. Wang, J. Yang, X. Zhang, B. Du, P. Bai, L. Li and R. Zhang, *Adv. Healthcare Mater.*, 2023, 2303537.
- 13 Q. Li, Y. Zhang, X. Huang, D. Yang, L. Weng, C. Ou, X. Song and X. Dong, *Chem. Eng. J.*, 2021, **407**, 127200.
- 14 N. Niu, N. Yang, C. Yu, D. Wang and B. Z. Tang, *ACS Mater. Lett.*, 2022, **4**, 692-700.
